# Supplementary material for: Three chemotypes of thyme (Thymus vulgaris L.) essential oil and their main compounds affect differently the IL-6 and TNFα cytokine secretions of BV-2 microglia by modulating the NF-κB and C/EBPβ signalling pathways
Source: Springer Nature journal article supplement (doi:10.1186/s12906-021-03319-w), 2021-05-22

# Three chemotypes of thyme (*Thymus vulgaris* L.) essential oil and their main compounds affect differently the IL-6 and TNF $\alpha$ cytokine secretions of BV-2 microglia by modulating the NF- $\kappa$ B and C/EBP $\beta$ signalling pathways

Györgyi Horváth<sup>1</sup>, Adrienn Horváth<sup>1</sup>, Gréta Reichert<sup>1</sup>, Andrea Böszörményi<sup>2</sup>, Katalin Sipos<sup>3</sup> and Edina Pandur<sup>3,\*</sup>

<sup>1</sup> Department of Pharmacognosy, Faculty of Pharmacy, University of Pécs, H-7624, Rókus u. 2., Pécs, Hungary; horvath.gyorgyi@gytk.pte.hu, horvath.adrienn2@pte.hu, reichertgreta@icloud.com

<sup>2</sup> Institute of Pharmacognosy, Faculty of Pharmacy, Semmelweis University, H-1085, Üllői út 26. Budapest, Hungary; boszormenyi.andrea@pharma.semmelweis-univ.hu

<sup>3</sup> Department of Pharmaceutical Biology, Faculty of Pharmacy, University of Pécs, H-7624, Rókus u.2., Pécs, Hungary; katalin.sipos@aok.pte.hu, edina.pandur@aok.pte.hu

\* Correspondence: [edina.pandur@aok.pte.hu](mailto:edina.pandur@aok.pte.hu)

**Supplementary Figure 1.** Original Western blots. (A) WBs showing p50, p65, P-C/EBP $\beta$  and  $\beta$ -actin protein levels after LPS pretreatment of BV-2 cells. (B) WBs showing protein levels of p50, p65 and P-C/EBP $\beta$  after essential oil pretreatment. (C) WBs showing protein levels of p50, p65 and P-C/EBP $\beta$  after LPS and essential oil co-treatment. The Western blots were performed using manual developing method. The development was made on X-Ray films, then the films were scanned using automatic grey scale mode and 600 dpi.

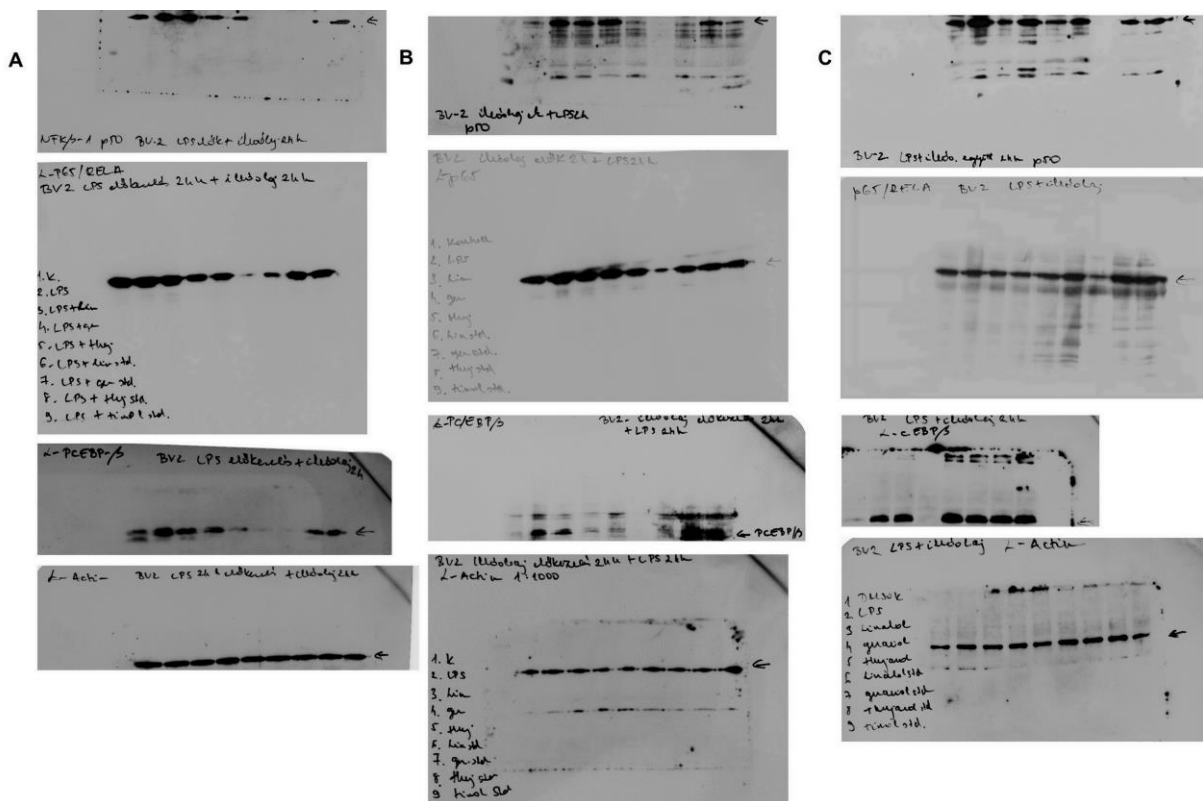

Supplement: MOESM1 [file 19188126]
